# Supplementary material
Source: PubMed Central journal article supplement (PMC6750805)

**Supplemental Material:****Figure 1.** Flow chart of participant selection.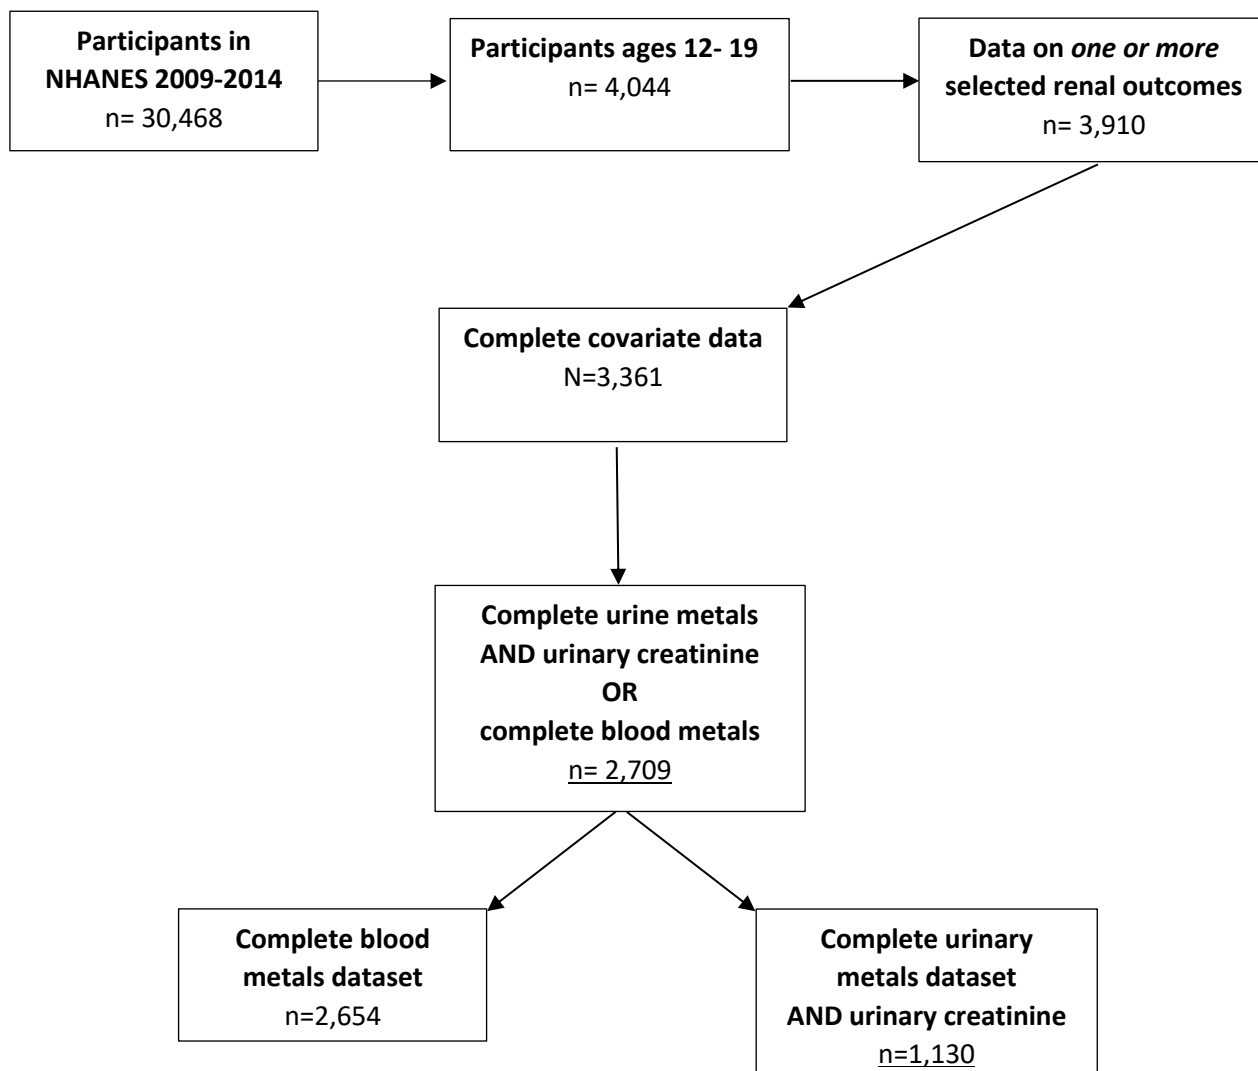

Supplement: NIHMS1535773-supplement-1.pdf [file NIHMS1535773-supplement-1.pdf]
